# 1 Non-pathogenic leaf-colonising bacteria elicit pathogen-like responses in a 2 colonisation density-dependent manner

3 Moritz Miebach<sup>1,2</sup>, Léa Faivre<sup>3</sup>, Daniel Schubert<sup>3</sup>, Paula Jameson<sup>1</sup>, Mitja Remus-  
4 Emsermann<sup>1,2,3</sup>

5  
6 <sup>1</sup>School of Biological Sciences, University of Canterbury, Christchurch 8140, New Zealand

7 <sup>2</sup>Biomolecular Interaction Centre, University of Canterbury, Christchurch 8140, New Zealand

8 <sup>3</sup>Institute of Microbiology and Dahlem Centre of Plant Sciences, Department of Biology, Chemistry,  
9 Pharmacy, Freie Universität Berlin, Berlin 14195, Germany

10

## 11 Plain Language Summary

12

13 Plants are colonised by diverse bacteria affecting many aspects of plant life. Here we show  
14 that plants do not differentiate between different bacteria but measure their quantities to  
15 keep bacterial numbers in check.

16

## 17 Abstract

18

19 Leaves are colonised by a complex mix of microbes, termed the leaf microbiota. Even  
20 though the leaf microbiota is increasingly recognised as an integral part of plant life and  
21 health, our understanding of its interactions with the plant host is still limited. Here,  
22 mature, axenically grown *Arabidopsis thaliana* plants were spray-inoculated with six  
23 diverse leaf-colonising bacteria. The transcriptomic changes in leaves were tracked over  
24 time and significant changes in ethylene marker (*ARL2*) expression were observed only  
25 two to four days after spray-inoculation. Whole transcriptome sequencing revealed that  
26 four days after inoculation, leaf transcriptional changes to colonisation by non-pathogenic  
27 and pathogenic bacteria differed in strength but not in the type of response. Inoculation of  
28 plants with different densities of the non-pathogenic bacterium *Williamsia* sp. Leaf354  
29 showed that high bacterial titers caused disease phenotypes and led to severe  
30 transcriptional reprogramming with a strong focus on plant defence. An *in silico*

31 epigenetic analysis of the data was congruent with the transcriptomic analysis. These  
32 findings suggest (1) that plant responses are not rapid after spray-inoculation, (2) that plant  
33 responses only differ in strength and (3) that plants respond to high titers of non-  
34 pathogenic bacteria with pathogen-like responses.

35

## 36 Introduction

37

38 Plants are colonised by a vast variety of bacteria with various effects on plant health and  
39 growth, ranging from pathogens to nitrogen-fixing rhizobacteria (Wang *et al.*, 2018; Kelly *et*  
40 *al.*, 2018). Past research mainly focused on a few important microbiota members,  
41 overlooking most of the remarkably diverse microbes present on and within plants.  
42 Increasing evidence showcases the positive effects of the plant microbiota on its host,  
43 including the protection against abiotic (Lau & Lennon, 2012) and biotic (Innerebner *et al.*,  
44 2011; Ritpitakphong *et al.*, 2016; Zengerer *et al.*, 2018; Vogel *et al.*, 2021) stressors, the  
45 promotion of growth (Spaepen *et al.*, 2009) and the assimilation of specific nutrients  
46 (Hacquard *et al.*, 2015; Singh *et al.*, 2022). Some of these beneficial effects are solely  
47 attributed to microbes, whereas others involve the plant as an interaction partner. For  
48 example, with regard to the protection against biotic stress, some microbes can protect the  
49 plant from a pathogen via resource competition with the pathogen (Ji & Wilson, 2002) or  
50 the production of antimicrobials targeting the pathogen (Zengerer *et al.*, 2018), whereas  
51 others stimulate the plant immune system, leading to increased immune responses upon  
52 subsequent infection with a pathogen (Pieterse *et al.*, 1996; Vogel *et al.*, 2016, 2021).

53

54 Even though the microbiota seems to be an integral part of plant life, our understanding of  
55 its interaction with the host is still limited. Studies on plant pathogens have shown that  
56 early perception of microbes is conferred by the detection of microbe-associated molecular  
57 patterns (MAMPs). MAMPs are conserved traits of microbes irrespective of their symbiotic  
58 relationship with the plant, raising the question if and how plants discriminate between  
59 pathogenic and beneficial bacteria. Recently, it was shown that plants respond to diverse  
60 non-pathogenic leaf colonisers, at varying intensities of transcriptional reprogramming

61 (Maier *et al.*, 2021). However, whether the amount of transcriptional reprogramming is  
62 caused by the different identities of the bacteria is unclear. Notably, the observed plant  
63 response was enriched for plant defence-associated genes and measured nine days after  
64 inoculation of ten-days-old seedlings, indicating persistently active immune responses.  
65 This is intriguing, since plant immune responses infer a growth penalty, commonly  
66 referred to as the growth-defence tradeoff (Huot *et al.*, 2014; He *et al.*, 2022).

67  
68 As a persistent immune activation infers a growth penalty, plants need to activate their  
69 immune system according to potential pathogen threat in a timely manner (Huot *et al.*,  
70 2014; He *et al.*, 2022). Different activation kinetics likely lead to different downstream  
71 signalling events and finally to a different immune response, highlighting the importance  
72 of time-resolved analyses. In other words, MAMPs are present early in the plant-microbe  
73 interaction and lead to early plant responses. However, MAMPs are less indicative of the  
74 symbiotic relationship between the microbe and the plant compared to effector proteins.  
75 Accordingly, plant responses triggered by MAMPs are more transient than those triggered  
76 by effector molecules (Gao *et al.*, 2013; Lamb & Dixon, 1997; Tsuda *et al.*, 2013). Plant  
77 responses to different MAMPs are almost identical early after MAMP application, but differ  
78 later, resulting in differential immune outputs (Zipfel *et al.*, 2006; Kim *et al.*, 2014; Bjornson  
79 *et al.*, 2021). Elf18 and chitosan, for example, predominantly activate jasmonic acid (JA)-  
80 mediated immune responses early on, resulting in JA-mediated immunity later, while  
81 flg22 activates jasmonic acid (JA)-mediated and ethylene (ET)-mediated immune  
82 responses early on, resulting in salicylic acid (SA)-mediated immunity later (Kim *et al.*,  
83 2014). This further highlights the importance of time-resolved analyses and suggests that,  
84 already at the level of MAMP recognition, plant immune responses differ depending on the  
85 cocktail of MAMPs present.

86  
87 The response of plants to leaf colonisation, whether by pathogenic or non-pathogenic  
88 bacteria, involves a significant transcriptome reprogramming (Moore *et al.*, 2011; Maier *et*  
89 *al.*, 2021). This reprogramming relies on the interaction of numerous transcription factors  
90 with the local chromatin environment. Indeed, several histone modifications such as

91 H3K4me3, H3K36me3 and lysine acetylation were found to contribute to the induction of  
92 genes following pathogen exposure (Berr *et al.*, 2012; Ding & Wang, 2015). By contrast,  
93 transcriptional reprogramming following colonisation by non-pathogenic bacteria has not  
94 been investigated.

95  
96 To monitor the dynamics of plant immune responses, we inoculated plants with diverse  
97 bacteria, including a plant pathogen, and measured transcriptional outputs, representing the  
98 three major phytohormone pathways in plant immunity (SA, JA and ET), at various times  
99 after inoculation. As the strongest responses were observed 96 hours post inoculation (hpi),  
100 we measured the whole transcriptional plant responses at this time. Interestingly, plant  
101 responses to various bacterial inoculants strongly overlapped and we observed a trend that  
102 the plant responses were dependent on bacterial density. Most differentially expressed  
103 genes in response to one isolate were also differentially expressed in response to isolates  
104 that exhibited overall stronger responses. The question then arose whether non-pathogenic  
105 bacteria could induce plant defence responses at artificially high colonisation densities. To  
106 address this question, we assessed the effects of different bacterial densities of the non-  
107 pathogenic leaf coloniser *Williamsia* sp. Leaf354 on *in planta* transcription as well as on  
108 plant health and plant weight 96 hpi and 21 dpi, respectively, to test the hypothesis that  
109 plants are monitoring bacterial population density rather than differentiating between  
110 different bacterial colonisers. Finally, in an effort to uncover chromatin marks that might  
111 contribute to transcriptional responses to non-pathogenic leaf colonisers, we performed an  
112 *in silico* chromatin analysis.

113

## 114 Materials and Methods

115

116 *Plant growth:* Plants were grown as previously described in (Miebach *et al.*, 2020). Briefly,  
117 sterilised seeds were germinated on ½ MS (Murashige and Skoog medium, including  
118 vitamins, Duchefa, Haarlem, Netherlands) 1% phytoagar (Duchefa) filled pipette tips.  
119 Healthy looking seedlings were aseptically transferred, without removal from the pipette  
120 tip, aseptically into Magenta boxes (Magenta vessel GA-7, Magenta LLC, Lockport, IL, USA)  
121 filled with ground Zeolite (sourced from cat litter - Vitapet, Purrfit Clay Litter, Masterpet  
122 New Zealand, Lower Hutt, New Zealand) and watered with 60 mL ½ MS. Each box received  
123 four seedlings. The boxes were closed with lids that allowed for gas exchange and placed  
124 into a climate cabinet (85% relative humidity, 11 h light, 13 dark, 21 °C, 150-200 µmol light  
125 intensity). Plants were grown for four weeks for the time course and six weeks for the  
126 bacterial density experiment before they were treated with bacteria or mock controls.

127

128 *Plant inoculation:* Bacterial suspensions were prepared as previously described in  
129 (Miebach *et al.*, 2020). Briefly, bacteria were cultivated at 30 °C on minimal media agar  
130 plates containing 0.1% pyruvate as a carbon source. Bacterial suspensions were prepared  
131 from bacterial colonies suspended in phosphate-buffered saline (PBS, 0.2 g L<sup>-1</sup> NaCl, 1.44 g  
132 L<sup>-1</sup> Na<sub>2</sub>HPO<sub>4</sub> and 0.24 g L<sup>-1</sup> KH<sub>2</sub>PO<sub>4</sub>) and washed twice via centrifugation at 4000 × *g* for 5  
133 min followed by discarding the supernatant and again adding PBS. Table **1** contains the list  
134 of bacteria used in this study. For the time course experiment the optical density (OD<sub>600 nm</sub>)  
135 was adjusted so that the suspension contained 2 × 10<sup>7</sup> colony forming units (CFU) ml<sup>-1</sup>. To  
136 explore the influence of bacterial load on plant responses, the bacterial suspensions were  
137 adjusted to 10<sup>5</sup>, 10<sup>6</sup>, 10<sup>7</sup> and 10<sup>8</sup> CFU ml<sup>-1</sup>. Next, 200 µL (time course experiment) or 1 ml  
138 (bacterial load experiment) of bacterial solution was sprayed per plant tissue culture box  
139 using an airbrush spray gun (0.2 mm nozzle diameter, Pro Dual Action 3 #83406). To obtain  
140 a homogeneous coverage, the distance between the airbrush spray gun and the plants was  
141 increased by stacking a plant tissue culture box, with the bottom cut off, onto the plant  
142 tissue culture box containing the plants being spray-inoculated.

143 **Table 1: List of bacterial strains used in this study.**

| Bacterial Strain                      | Reference                  | Abbreviation |
|---------------------------------------|----------------------------|--------------|
| <i>Pseudomonas syringae</i><br>DC3000 | (Cuppels, 1986)            | Pst          |
| <i>Sphingomonas</i> sp. Leaf34        | (Bai <i>et al.</i> , 2015) | Sphingo34    |
| <i>Acidovorax</i> sp. Leaf84          | (Bai <i>et al.</i> , 2015) | Acido84      |
| <i>Microbacterium</i> sp. Leaf347     | (Bai <i>et al.</i> , 2015) | Micro347     |
| <i>Williamsia</i> sp. Leaf354         | (Bai <i>et al.</i> , 2015) | Willi354     |
| <i>Pedobacter</i> sp. Leaf194         | (Bai <i>et al.</i> , 2015) | Pedo194      |

144

145 *Bacterial enumeration:* Above ground plant parts were detached from belowground parts  
146 using sterilised equipment and placed individually into pre-weighed 1.5 mL tubes. After  
147 determining the plant weight 1 mL PBS 0.02% Silwet L-77 (Helena Chemical Company) was  
148 added to each tube. Bacteria were dislodged from the sample by shaking twice at  $2.6 \text{ m s}^{-1}$   
149 for 5 min (Omni Bead Ruptor 24) and sonication for 5 min. Bacterial CFU were enumerated  
150 using plate counting on R2A media plates.

151

152 *Gene expression analysis:* Four-weeks-old and six-weeks-old plants were spray-  
153 inoculated with individual strains (Table 1) or PBS (mock control) for the time course and  
154 bacterial load experiment, respectively. For the time course experiment above ground  
155 plant parts were harvested after 1, 3, 6, 9, 12, 24, 48, and 96 h post inoculation (hpi). For the  
156 bacterial load experiment above ground plant parts were harvested 96 hpi. The plant  
157 material was collected in RNase-free microcentrifuge tubes (MCT-150-C, Axygen, Corning,  
158 USA) and was then immediately flash frozen in liquid  $\text{N}_2$ . Two plants from different  
159 growth boxes were pooled per tube to form a biological replicate. Three biological  
160 replicates were sampled per treatment and time point. Flash-frozen samples were ground

161 to a fine powder in the collection tube using Teflon pestles (General Lab Supply, Lab  
162 Supply, Dunedin, New Zealand). RNA extraction was performed using the Isolate II RNA  
163 Plant kit (Bioline, London, England).

164  
165 *RT-qPCR analysis:* For cDNA synthesis, 1 µg of RNA was used and for the no Reverse  
166 Transcriptase (noRT) control, using the VitaScript First strand cDNA synthesis kit  
167 (Procomcure Biotech, Thalgau, Austria). RT-qPCR was performed using the 2× ProPlant  
168 SYBR Mix (Procomcure Biotech) in 15 µL reaction volumes with 0.2 µM of each primer and  
169 0.001 g L<sup>-1</sup> of initial RNA in the cDNA mix. QPCRs were run using the recommended  
170 protocol for 2× ProPlant SYBR Mix (Procomcure Biotech) on a Rotor-Gene Q (Qiagen,  
171 Hilden, Germany). Technical triplicates were performed for each sample. The ROX dye,  
172 present in the 2× ProPlant SYBR Mix, was used to normalise for master mix variation  
173 between tubes. A mix of equal amounts of all cDNAs was used for normalisation between  
174 runs. mRNA concentrations were calculated using Equation (1).

175 
$$(1) \text{ mRNA concentration (a. u.)} = 1/(\text{primer efficiency})^{Cq}$$

176  
177 Primers that were first used in this study were designed using 'primer-blast' (NCBI,  
178 Bethesda, MD, USA). Primer efficiencies were determined via serial template dilutions  
179 (Nolan *et al.*, 2013). The mRNA concentration of each target gene was then normalised  
180 against the mean mRNA concentration of two stably expressed, previously described  
181 reference genes (Table 2, (Czechowski *et al.*, 2005)). Next, the normalised mRNA  
182 concentration of each treatment (bacterial inoculation) was normalised against the mean  
183 normalised mRNA concentration of mock-treated samples to emphasise treatment-related  
184 changes in gene expression (Denoux *et al.*, 2008).

185 **Table 2: List of primers used in this study.**

| Template         | Reference                        | 5` primer (forward)         | 3` primer (reverse)          |
|------------------|----------------------------------|-----------------------------|------------------------------|
| <i>ARL2</i>      | (Miebach <i>et al.</i> , 2020)   | cgaaccgtccgtacatacataa      | ttgcacgaaactaaaactaaaagc     |
| <i>PR1</i>       | (Miebach <i>et al.</i> , 2020)   | gatgtgccaaagtgaggtgtaa      | ttcacataattcccacgagga        |
| <i>At3g50280</i> | This work                        | ccttcgctggctgctttaac        | cagagccatcaggtcgaaga         |
| <i>VSP1</i>      | (Dombrecht <i>et al.</i> , 2007) | ggacttgccctaaagaacga        | gtgttctcggtoccatatcc         |
| <i>LOX2</i>      | (Vogel <i>et al.</i> , 2016)     | agtcttcacgccaggctatg        | gagtcctcaaccaatgggaa         |
| <i>ERF1</i>      | (Vogel <i>et al.</i> , 2016)     | agtccaagagtcgcttcgg         | tcgagtgttctcttcaacg          |
| <i>PAD3</i>      | (La Camera <i>et al.</i> , 2011) | tgctccaagacagacaatg         | gttttgatcagaccatc            |
| <i>CRK5</i>      | (Vogel <i>et al.</i> , 2016)     | tcaccactagacctcgtggatt      | gtaagcattggacgatcgc          |
| <i>CRK23</i>     | (Vogel <i>et al.</i> , 2016)     | gctactccagtggattccga        | aaaggcgacacagttatggc         |
| <i>AT1G51890</i> | (Vogel <i>et al.</i> , 2016)     | tgcttgagaccgctcattta        | aagctgggaaacaagaatgc         |
| <i>SWEET4</i>    | (Chen <i>et al.</i> , 2010)      | ccatcatgagtaaggatcaaga      | caaatgaaaaggtcgaacttaataagtg |
| <i>SWEET12</i>   | (Chen <i>et al.</i> , 2010)      | aaagctgatattttctactacttogaa | cttacaatcctatagaacgttggcac   |
| <i>STP13</i>     | (Yamada <i>et al.</i> , 2016)    | tgtttctgtttaactccttgagaga   | ttcgccgaagtcgcaaatcctcctc    |



|                                 |                                   |                           |                       |
|---------------------------------|-----------------------------------|---------------------------|-----------------------|
| <i>At2g28390</i><br>(reference) | (Miebach <i>et al.</i> ,<br>2020) | ggattttcagctactcttcaagcta | tctgccttgactaagttgaca |
| <i>At4g26410</i><br>(reference) | (Miebach <i>et al.</i> ,<br>2020) | cgtccacaaagctgaatgtg      | cgaagtcatggaagccactt  |

186

187 *RNA sequencing:* RNA library preparation and sequencing was performed by Custom  
188 Science (Epping, Australia). RNA quality and purity was assessed using a Nanodrop (ND-  
189 2000 Spectrophotometer, Thermo Scientific, Waltham, MA, USA). RNA integrity was  
190 verified on a 2100 Bioanalyzer (Agilent, Santa Clara, CA, USA) using the RNA 6000 Nano Kit  
191 (Agilent). Poly-A enriched libraries were prepared using the NEBNext Ultra™ RNA Library  
192 Prep Kit (New England Biolabs, Ipswich, USA) for Illumina. RNA sequencing was performed  
193 on a NovaSeq 6000 (Illumina, San Diego, USA) platform. Approximately 30,000,000 paired-  
194 end reads with a length of 150 bp were generated per sample. Adapters and low-quality  
195 reads (end sequences with base quality < 20 and sequences with N content > 10%) were  
196 removed from raw sequences and sequences below 75 bp were filtered using cutadapt  
197 (v1.9.1) (Martin, 2011). The resulting reads were mapped against the *Arabidopsis thaliana*  
198 (*arabidopsis*) reference genome (TAIR10). Mapped reads were counted with featureCounts  
199 (v1.22.2) (Liao *et al.*, 2014). RNA sequencing data are available from the GEO repository  
200 under accession number GSE232254.

201

202 *RNA sequencing data analysis:* Genes above 0.5 counts per million in at least three  
203 samples were used for differential gene expression analysis using edgeR (Robinson *et al.*,  
204 2010). Counts were scaled to effective library sizes by the trimmed mean of M values  
205 method (Robinson & Oshlack, 2010). Gene-wise dispersions were estimated via Cox-Reid  
206 profile-adjusted likelihood and squeezed to trended dispersions using an empirical Bayes  
207 method (McCarthy *et al.*, 2012). Genes were determined as differentially expressed using  
208 the TREAT method under edgeRs general linear model framework (McCarthy & Smyth,  
209 2009). Genes with a fold change (FC) significantly above  $\log_2(1.3)$  and below a False

210 Discovery Rate (FDR; Benjamini-Hochberg  $p$  correction) cut-off of 5% were kept as  
211 differentially expressed genes (DEGs). The FC threshold was determined using elbow plots  
212 (Fig. **S3a**, Fig. **S4a**). MDS plots were generated from trimmed mean of M values method  
213 normalised gene counts. K-means clusters were calculated from  $\log_2$ -transformed counts  
214 per million, that were centred around the mean for each gene. A prior count of two was  
215 added to each gene count to prevent taking the logarithm of zero. Elbow plots were used to  
216 determine the optimal number of Ks (Fig. **S3b**, Fig. **S4b**). Heatmaps were generated from  
217  $\log_2$ -transformed counts per million (cpm), that were centred around the mean for each  
218 gene. GO term enrichment analysis was performed using the PANTHER classification  
219 system (v17.0) (Mi *et al.*, 2021).

220 *Chromatin state analysis*: Chromatin state coordinates were obtained from (Sequeira-  
221 Mendes *et al.*, 2014) and gene coordinates were obtained from the TAIR10 annotation from  
222 BioMart, Plantsmart28 (Durinck *et al.*, 2005). A gene was considered to be in a certain state  
223 if at least 150 bp (approximate length of DNA wrapped around one nucleosome) of its gene  
224 body overlapped with the respective state. Thus, a single gene may have several distinct  
225 states along its coding sequence. Genes induced or repressed after Pst exposure were  
226 divided into two sets depending on whether they were also differentially expressed by  
227 exposure to Micro347 or Willi354 (Non Pst-specific) or only by Pst (Pst-specific). Similarly,  
228 genes induced or repressed by the highest inoculation density of Willi354 were divided  
229 into two sets depending on whether they were also differentially expressed by exposure to  
230 lower bacterial densities (non  $10^8$ -specific) or not ( $10^8$ -specific). The proportion of genes of  
231 interest in each chromatin state was compared with the proportion of genes in the  
232 respective state in the complete genome. The significance of the difference between the  
233 two proportions was tested using the Marascuilo procedure, with a confidence level of  
234 0.95.

## 235 Results

236 The aim of this study was to broaden our knowledge of the intricate relationship between  
237 the plant and its bacterial colonisers. The focus lay on assessing plant transcriptional  
238 responses to a diverse array of microbial colonisers. Therefore, six microbial leaf  
239 colonisers representing all major phyla of the core leaf microbiota were selected (Vorholt,  
240 2012; Bai *et al.*, 2015) (Fig. 1).

241

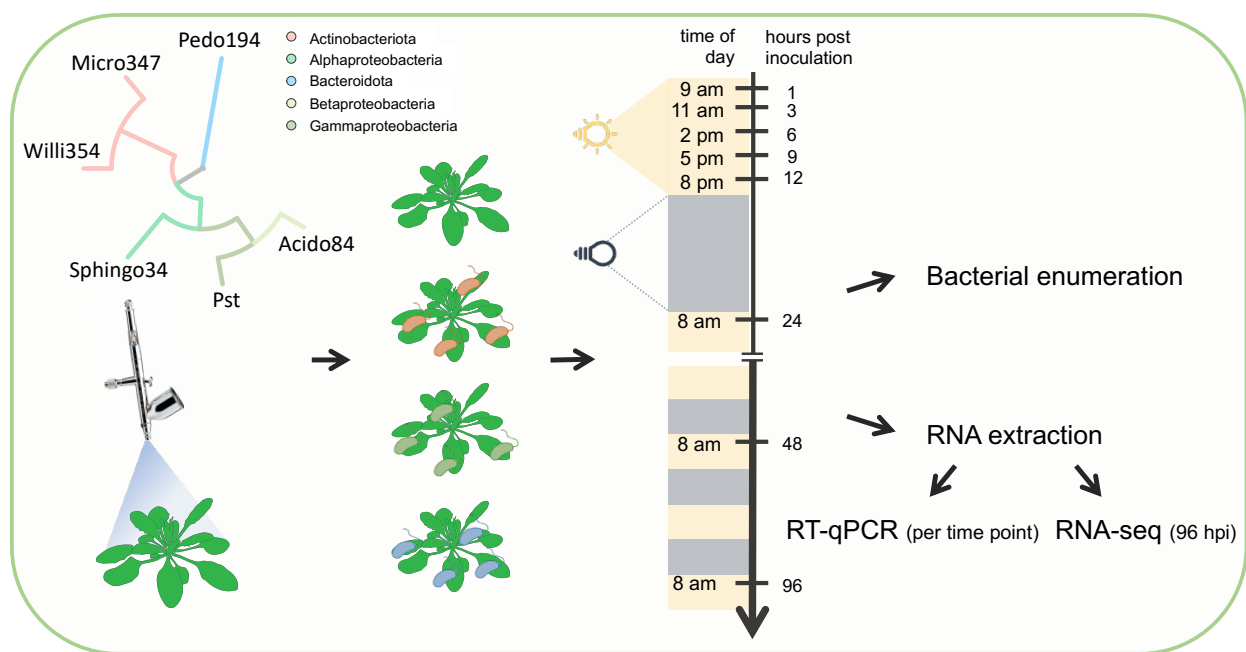

242

243 **Fig. 1: Experimental design.** Four-weeks-old axenically-grown *Arabidopsis thaliana* plants were  
244 spray-inoculated with individual bacterial strains, depicted in the phylogenetic tree in the top left  
245 corner of the figure. Plants were harvested at different times after inoculation. Some plants were used  
246 for bacterial enumeration and others for RNA extraction.

247

### 248 *Temporal responses of the plant immune system*

249 *Arabidopsis* plants were grown axenically in the 'Litterbox' system, to ensure (1) low  
250 artificial, but strictly controlled, growth conditions and (2) to prevent a strong inoculation  
251 of the growth media post inoculation (Miebach *et al.*, 2020). Four-weeks-old plants were  
252 spray-inoculated with individual strains of bacterial leaf colonisers, at  $\sim 10^5$  -  $10^6$  bacteria  
253 per g of leaf, the bacterial carrying capacity of plants in temperate environments (Kniskern

254 *et al.*, 2007; Reisberg *et al.*, 2012; Rastogi *et al.*, 2012; Burch *et al.*, 2016; Gekenidis *et al.*, 2017) .  
 255 The temporal course of bacterial densities post inoculation confirmed that bacteria were  
 256 sprayed close to carrying capacity. Within 4 dpi the bacterial densities for Sphingo34 and  
 257 Micro347 remained stable at  $10^6$  bacteria per g of leaf. In contrast, the bacterial densities for  
 258 Willi354 and Pst slightly rose to  $10^7$  bacteria per g of leaf within 4 dpi (Fig. **2a**). Interestingly,  
 259 the bacterial density of Micro347 significantly ( $p < 0.001$ , Tukey's HSD test) dropped to  $\sim 10^4$   
 260 bacteria per g of leaf 7 dpi. This two-magnitude drop in bacterial density cannot be  
 261 explained by the increase in plant weight (Fig. **S1**) and, therefore, suggests that the bacteria  
 262 were dying.

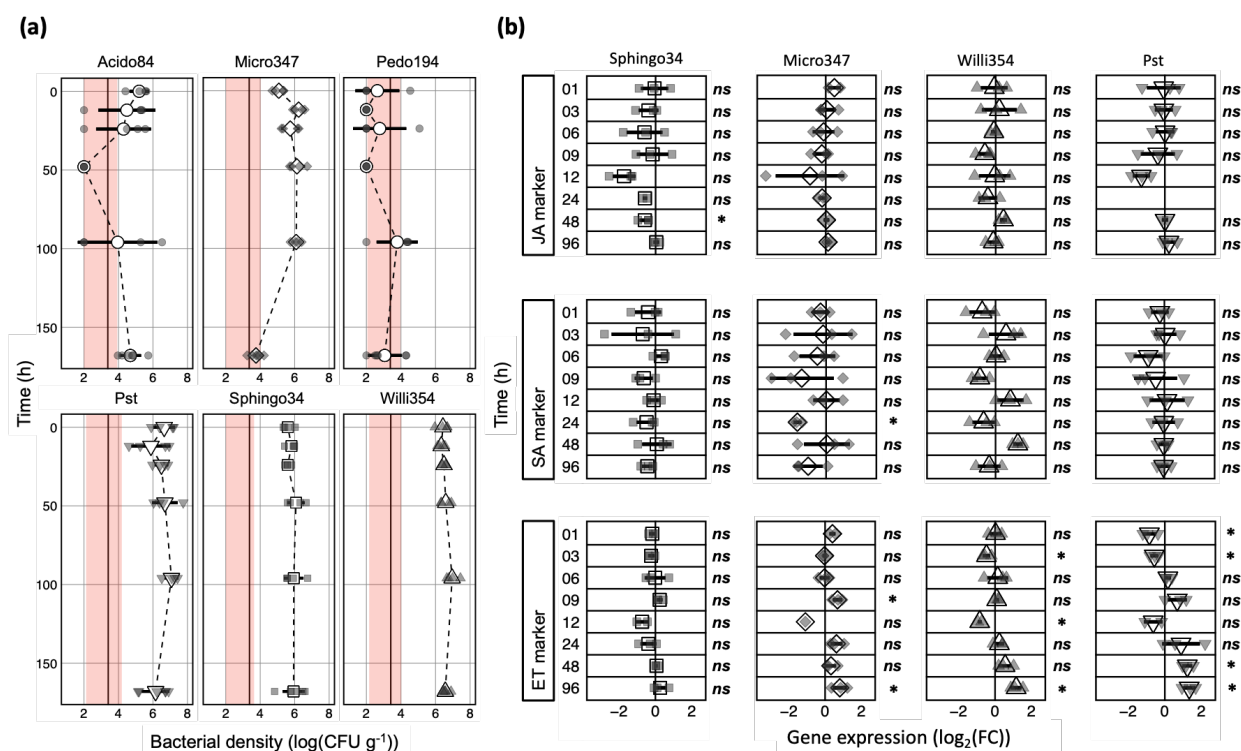

263  
 264 **Fig. 2: Temporal transcriptional responses to bacterial colonisation.** Four-weeks-old axenically-  
 265 grown arabidopsis plants were spray-inoculated with individual bacterial strains (see coloured boxes;  
 266 strains are sorted alphabetically in (a) and by response amplitude of the ethylene marker gene in (b)).  
 267 (a) Bacterial density on above ground plant parts at several times post inoculation. To accommodate  
 268 plants with CFU below the limit of detection,  $10^2$  CFU g<sup>-1</sup> were added to the count of every sample. (b)  
 269 Depicted are log<sub>2</sub>(FC) in gene expression relative to mock-treated control for a jasmonic acid (JA)  
 270 marker gene (*At3g50280*), a salicylic acid (SA) marker gene (*PR1*) and an ethylene (ET) marker gene  
 271 (*ARL2*). Large white shapes depict the mean, bars depict standard deviation, smaller grey shapes

272 depict individual biological replicates, dashed black line connects the means, solid black line  
273 represents the lower limit of detection based on mean plant weight and the red areas represent the  
274 range of the limit of detection based on the heaviest and lightest plant, \* depicts statistical  
275 significance (Bonferroni corrected  $p < 0.05$ ) and *ns* depicts the lack of statistical significance, T-test.

276

277 Two out of the six bacterial leaf colonisers, Acido84 and Pedo194, failed to consistently  
278 establish densities above the threshold of detection. Acido84 was recovered from some,  
279 but not all plants. Whenever Acido84 was recovered it reached densities of  $\sim 10^5 - 10^6$  CFU  
280  $g^{-1}$ . This heterogeneity in colonisation success was unlikely to have been caused by non-  
281 homogeneous spray inoculation, as other inoculants exhibited considerably lower plant to  
282 plant variation (Fig. **2a**). Further, all plants sampled 168 hpi harboured  $\sim 10^4 - 10^6$  CFU  $g^{-1}$ .

283

284 Plants inoculated by one of the four successful coloniser strains, Micro347, Pst, Sphingo34  
285 and Willi354, were investigated further by qPCR (Fig. **2b**). Early temporal changes in the  
286 plant immune response were tracked using previously reported marker genes that follow  
287 the levels of the three major phytohormones in plant immunity: ET, JA and SA (Kim *et al.*,  
288 2014). Marker gene expression was measured at eight different time points ranging from 1  
289 hpi to 96 hpi. As dynamic changes in expression were expected early after inoculation, five  
290 of the eight measurement times fell within the first 12 hpi.

291

292 Surprisingly, gene expression changes caused by the bacterial treatments were relatively  
293 weak. The strongest changes did not exceed 5-fold (maximum mean: 2.5-fold; maximum  
294 individual replicate: 4.6-fold) in gene expression, relative to the mock-treated control (Fig.  
295 **2b**). The strongest changes were observed in the expression of the ET marker, *ARL2*. Early  
296 after inoculation, its expression dropped significantly, at 1 and 3 hpi for Pst and 3 hpi for  
297 Willi354. After recovering to the expression levels found in mock-treated plants the  
298 relative expression of the ET marker dropped again at 12 hpi, which was significant in the  
299 case of Willi354, with Pst seemingly following the same trend. Expression levels then rose  
300 above mock-treated control by  $\sim 2.5$ -fold at 96 hpi, with changes being statistically

301 significant for 48 and 96 hpi for Pst and 96 hpi for Willi354 (Fig. **2b**). In addition, Micro347  
302 showed a significant ~ 1.8-fold rise in ET marker gene expression at 96 hpi (Fig. **2b**).

303  
304 Regarding the JA marker, statistically significant changes were only observed in response  
305 to Sphingo34. A drop in expression was observed between 12 and 48 hpi with the latter  
306 being statistically significant, but rather weak at ~ 1.5-fold (Fig. **2b**). Expression of the SA  
307 marker, *PRI*, fluctuated strongly, but not significantly between up- and downregulation  
308 upon Willi354 treatment. Strong fluctuations between no expression change and a strong  
309 downregulation were observed following Micro347 treatment with a significant ~ 3-fold  
310 decrease in expression at 24 hpi. Sphingo34 and Pst elicited no changes in *PRI* expression  
311 (Fig. **2b**).

312  
313 The increase in ET marker expression within the last three sampling times (24, 48, 96 hpi)  
314 seemed to follow the increase in bacterial density of the inoculants (Fig. **2a, b**).

315 Interestingly, 57% (adj.  $R^2 = 0.57$ ,  $p = 0.0027$ ) of the change in gene expression relative to the  
316 mock control can be explained by the bacterial density, irrespective of the inoculant  
317 (Fig. **3**).

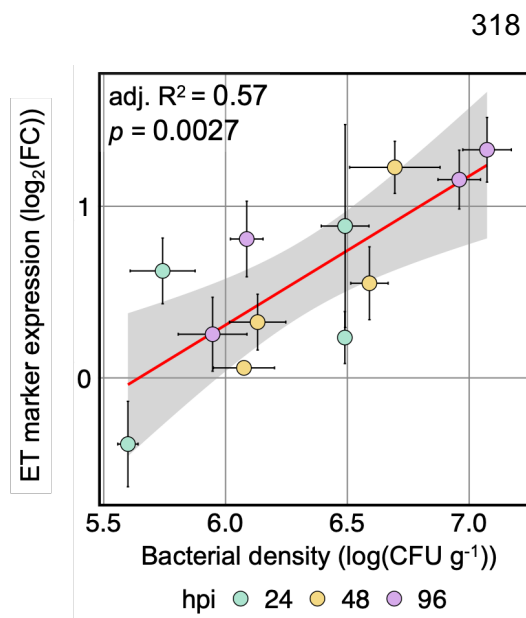

**Fig. 3: Ethylene marker responses may be explained by bacterial density.** Correlation between mean  $\log_2(\text{FC})$  in gene expression of ethylene (ET) marker gene (*ARL2*) relative to mock-treated control and mean bacterial density. Colours depict the time of sampling post inoculation, red line depicts a fitted linear model, the grey bar depicts limits of 95% confidence interval, error bars depict standard error of the mean.  $n = 3$  and 4 for mean  $\log_2(\text{FC})$  in gene expression and mean bacterial density, respectively.

330 *Genome-wide transcriptional changes indicate strong similarity in the plant response to*  
331 *various bacterial leaf colonisers*

332 The strongest changes in gene expression were observed in Pst, Willi354 and Micro347  
333 treated plants at 96 hpi. To gain an understanding of genome-wide transcriptional  
334 changes to individual leaf-colonising strains, the RNA of plants sampled at 96 hpi treated  
335 with either Pst, Willi354 or Micro347 were further subjected to RNA sequencing. The  
336 expression profiles of various target genes quantified by RNA sequencing were similar to  
337 those quantified by RT-qPCR confirming that RNA sequencing was performed correctly  
338 (Fig. **S2**). As expected, the transcriptomes of mock-treated plants were distinct from those  
339 of inoculated plants, as shown by multi-dimensional scaling (MDS) and k-means  
340 clustering (Fig. **4a**, Fig. **S3c**). The transcriptomes separate by treatment along the first  
341 dimension of the MDS plot (Fig. **4a**). Mock and Pst treated samples separate the furthest,  
342 corresponding to a leading FC of ~ 4-fold between the two treatments. Micro347 and  
343 Willi354 treated samples cluster close to Pst with Willi354 being closer to Pst than  
344 Micro347, indicating a higher overlap of differentially expressed genes (DEGs). The second  
345 dimension of the MDS plot mainly separates the individual transcriptomes within a  
346 treatment group, showing low variation within Micro347 samples and strong variation  
347 within Willi354 samples, corresponding to a leading FC of ~ 3-fold (Fig. **4a**).

348  
349 Genes with a significant FC threshold of  $\log_2(1.3)$  based on the edgeR TREAT algorithm  
350 (McCarthy & Smyth, 2009) and a FDR < 0.05 were defined as DEGs. This FC threshold was  
351 chosen, based on the median 'elbow', the point of maximum curvature (second derivative)  
352 of the number of DEGs as a function of the  $\log_2(\text{FC})$  threshold per treatment (Fig. **S3a**). Pst  
353 treated plants exhibited 757 DEGs at this FC threshold, followed by Willi354 with 172 DEGs  
354 and Micro347 with 106 DEGs. Interestingly, almost all the DEGs in Micro347 are also  
355 differentially expressed in Willi354 and Pst. In addition, almost all the DEGs found in  
356 Willi354 are also differentially expressed in Pst (Fig. **4b**). This shows that plant responses  
357 to these three leaf-colonising strains are largely similar but differ in their strength  
358 depending on the leaf coloniser. A closer look at individual gene expression changes  
359 further highlights the similarity in the responses. Most changes follow a sequence with

360 either increasing or decreasing expression from mock-treated control over Micro347 and  
 361 Willi354 to Pst-treated plants (Fig. 4c, Fig. S3c). Further, all the 770 genes that were  
 362 differentially expressed in any of the treatments, were either up- or downregulated in all  
 363 the treatments. No gene was significantly upregulated in one treatment and significantly  
 364 downregulated in another.  
 365

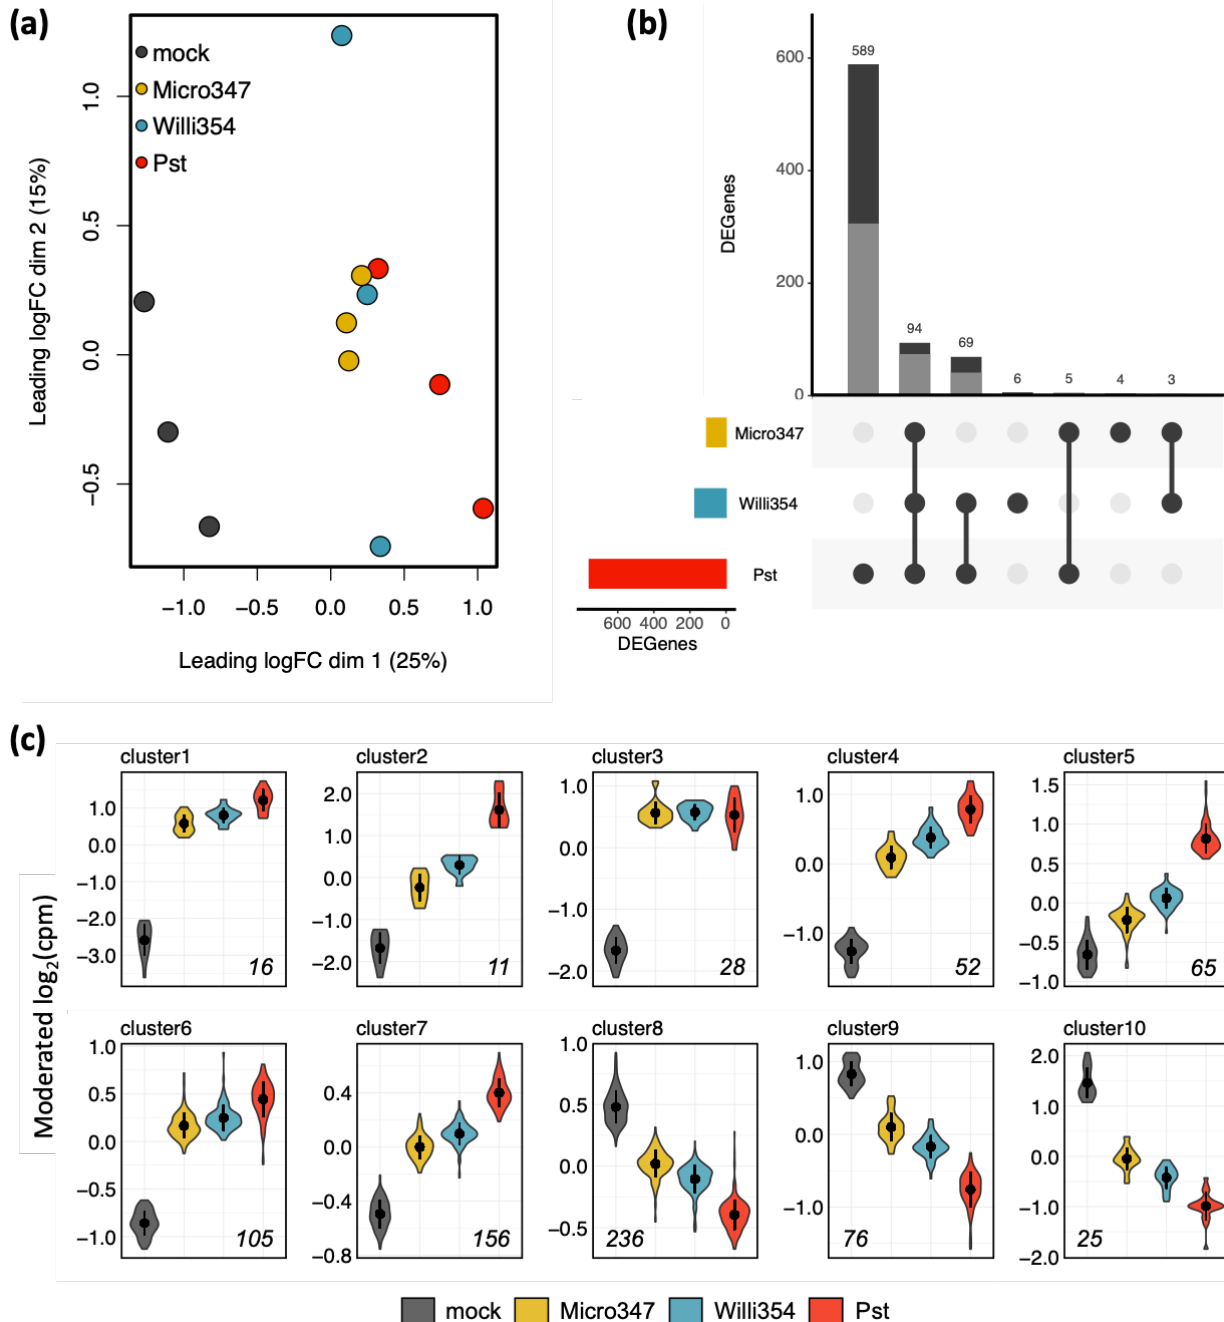



367 **Fig. 4: Comparison of transcriptomic response to various leaf-colonising strains. (a)**

368 Multidimensional scaling plot of transcriptomes of above ground plant parts of four-weeks-old  
369 axenically-grown arabidopsis plants four days after spray-inoculation with individual bacterial  
370 strains. Points depict individual transcriptomes, colour depicts inoculant or mock control treatment.

371 **(b)** UpSet plot of DEGs in the different treatments. The coloured bar chart on the left depicts the total

372 number of DEGs per treatment. The black dots in the panel's matrix depict unique (individual dots)

373 and overlapping (connected dots) DEGs. The top bar chart depicts DEGs for each unique or overlapping

374 combination in the panel's matrix. Grey bar depicts upregulated DEGs, black bar depicts

375 downregulated DEGs. **(c)** Plots showing moderated  $\log_2(\text{cpm})$  of DEGs per k-means cluster of

376 transcriptomes of above ground plant parts of four-weeks-old axenically-grown arabidopsis plants

377 four days after spray-inoculation with individual bacterial strains. Colours depict the treatment, the

378 italicised number in each plot depicts the number of DEGs per cluster. Treatments were ordered based

379 on the number of DEGs. Note that the y-axis differs between different cluster-plots.

380

381 To gain a better resolution of gene expression changes, the 770 genes that were

382 differentially expressed in any of the treatments were further separated by k-means

383 clustering. K-means clustering was performed based on moderated  $\log_2(\text{cpm})$ . Ten k-

384 means were chosen, based on the 'elbow' of the total sum of squares as a function of the

385 number of k-means (Fig. **4c**, Fig. **S3b,c**). The 433 upregulated genes are in clusters 1-7, and

386 the 337 downregulated genes are in clusters 8-10 (Fig. **4c**, Fig. **S3c**). In addition to more

387 genes being significantly upregulated than downregulated, FCs were greater in

388 upregulated genes. Clusters 1 and 2 contain genes with the strongest upregulation and

389 cluster 10 genes with the strongest downregulation at FCs in moderated  $\log_2(\text{cpm})$  of ~ 16-

390 fold and ~ 6-fold, respectively (Fig. **4c**).

391

392 ***Transcriptional responses depend on bacterial load***

393 As seen above, responses to bacterial colonisation seem to be largely similar (Fig. **4b,c**) in

394 response to the tested strains. This was especially surprising as Pst is an arabidopsis

395 pathogen, whereas Micro347 and Willi354 were isolated from leaves of asymptomatic

396 plants (Cuppels, 1986; Bai *et al.*, 2015). In addition, bacterial density, irrespective of the

397 bacterial coloniser, had a highly significant effect on ethylene responses (Fig. **3**). Taken

398 together, this suggests that pathogenicity is to some extent dependent on bacterial density,  
399 following Paracelsus' theory "the dose makes the poison" (Paracelsus, 1538). This raises the  
400 question whether non-pathogenicity of bacteria is merely a case of the plant balancing  
401 their proliferation, or the bacteria doing so in order to avoid being penalised by the plant.  
402 To gain a better understanding of plant responses to non-pathogenic leaf-colonising  
403 bacteria and to determine whether the bacterial load changes the nature of the response,  
404 plants were inoculated with different concentrations of Willi354 followed by RNA  
405 sequencing. Willi354 was chosen for this experiment as it exhibited stronger responses  
406 than Micro347 in the previous experiment (Fig. **4b,c**).

407  
408 Six-weeks-old axenically-grown arabidopsis plants were spray inoculated with Willi354  
409 with inoculation densities ranging from  $10^5$  CFU ml<sup>-1</sup> to  $10^8$  CFU ml<sup>-1</sup>. Four days after  
410 inoculation, the bacterial densities on the plants ranged from  $6.57 \times 10^6$  CFU g<sup>-1</sup> to  $3.22 \times 10^8$   
411 CFU g<sup>-1</sup> and strongly correlated with the inoculation density (adj.R<sup>2</sup> = 0.9265,  $p = 3.594 \times 10^{-14}$ )  
412 (Fig. **5a**). The transcriptomic response of the plants changed gradually with increasing  
413 inoculation density, as seen in the MDS plot and k-means clustering (Fig. **5b**, Fig. **S4**). The  
414 transcriptomes separate along the first dimension of the MDS plot, which explains 55% of  
415 the variation between the different samples, with those of mock-treated plants and those  
416 of plants inoculated with Willi354 at  $10^8$  CFU ml<sup>-1</sup> being most dissimilar at a leading FC of ~  
417 16-fold (Fig. **5b**).  
418

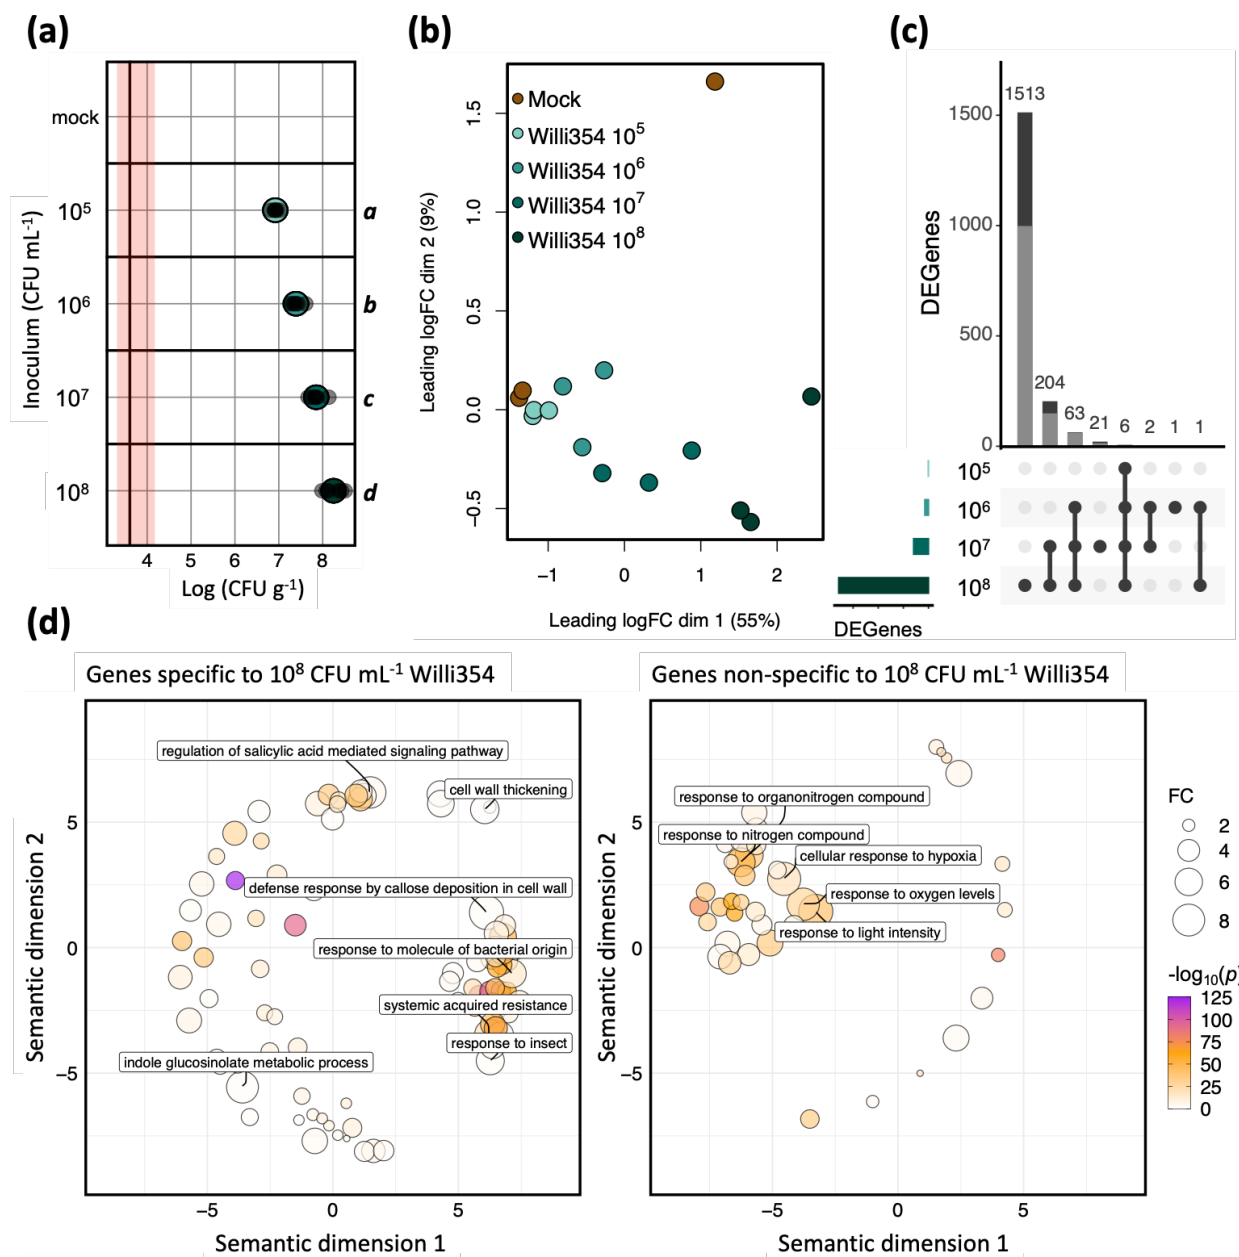

419  
 420 **Fig. 5: Plant transcriptomic response to different densities of Willi354** (a) Bacterial density of  
 421 Willi354 on above ground plant parts of six-weeks-old axenically-grown arabidopsis plants 96 hpi  
 422 with different initial densities. Coloured circles depict the mean, bars depict standard deviation,  
 423 smaller grey circles depict the bacterial density from individual biological replicates, the vertical black  
 424 line represents the threshold of detection based on mean plant weight, red bar represents the  
 425 threshold range of detection based on the heaviest and lightest plant. Letters on the right side of the  
 426 plot depict statistical differences ( $p < 0.001$ , one-way ANOVA & Tukey's HSD test). (b).  
 427 Multidimensional scaling plot of transcriptomes of arabidopsis above ground plant parts 96 hpi.

428 Circles depict individual transcriptomes, colour depicts inoculation density or mock control  
429 treatment. (c) UpSet plot of transcriptomes depicted in (b). Genes with a FC significantly above  $\log_2(1.3)$   
430 and a FDR < 0.05 were defined as DEGs. In each panel, the bottom left bar chart depicts the overall  
431 number of DEGs per treatment. The dots in the panel's matrix depict unique (individual dots) and  
432 overlapping (connected dots) DEGs. The top bar chart depicts DEGs for each unique or overlapping  
433 combination in the panel's matrix. Grey bar depicts upregulated DEGs, black bar depicts  
434 downregulated DEGs. (d) Functional enrichment of genes specifically and non-specifically expressed  
435 to high densities of Willi354. Functional enrichment of GO terms distributed in the semantic space.  
436 Closeness in semantic space ideally reflects closeness in GO term structure. Circles depicted  
437 significantly enriched GO terms ( $p < 0.05$ , Bonferroni corrected). Circle size depicts fold enrichment,  
438 colour depicts  $-\log_{10}(p)$ . GO terms with a FC > 6 are labelled.

439  
440 Genes were defined as DEGs as described above. Plants treated with  $10^5$ ,  $10^6$ ,  $10^7$  and  $10^8$  CFU  
441  $\text{ml}^{-1}$  of Willi354 exhibited 6, 73, 296 and 1787 DEGs, respectively. A total of 1811 genes were  
442 differentially expressed across all treatments, with ~ 68% (1230 DEGs) being upregulated  
443 (Fig. **5c**). Further, upregulated genes exhibited stronger changes in gene expression, the  
444 strongest being ~ 30-fold in moderated  $\log_2(\text{cpm})$ , compared to downregulated genes, the  
445 strongest being ~ 4-fold in moderated  $\log_2(\text{cpm})$  (Fig. **S5**). This highlights that positive  
446 expression changes are not only more prominent, but also stronger than negative  
447 expression changes. The DEGs were separated by k-means clustering into 10 clusters.  
448 Clusters 1-8 contained the upregulated, and clusters 9 and 10 contained the downregulated  
449 genes (Fig. **S4c**, Fig. **S5**). Most genes showed no marked difference between mock-treated  
450 plants and plants treated with Willi354 at  $10^5$  and  $10^6$  CFU  $\text{ml}^{-1}$ . At concentrations of  $10^7$  and  
451  $10^8$  CFU  $\text{ml}^{-1}$ , genes in clusters 1, 3, 4, 6 and 8 were strongly upregulated, with genes at  $10^8$   
452 being upregulated twice as much compared to those at  $10^7$  (Fig. **S5**). Genes in clusters 5 and  
453 7 appear to follow a sigmoidal curve, with no difference in gene expression between plants  
454 inoculated with Willi354 at  $10^7$  and  $10^8$  CFU  $\text{ml}^{-1}$  in cluster 7 (Fig. **S5**). Genes in clusters 9  
455 and 10 exponentially decreased in expression with increasing density of Willi354 (Fig. **S5**).  
456  
457 To further explore the nature of plant responses to inoculation with Willi354, a GO term  
458 enrichment analysis was performed on two different sets of genes. The first set comprised

459 genes that were exclusively differentially expressed in plants treated with Willi354 at  
460  $10^8$  CFU ml<sup>-1</sup>, whereas the second set comprised genes that were also differentially  
461 expressed at lower densities of Willi354. The functional profiles of both sets of genes were  
462 markedly different (Fig. **5d**). Genes differentially expressed exclusively at the highest  
463 density of Willi354, were greatly enriched for genes related to plant immunity, including  
464 perception of the biotic environment, such as 'response to molecule of bacterial origin' and  
465 'response to insect', metabolism of secondary metabolites such as 'indole glucosinolate  
466 metabolic process', local defence responses such as 'cell wall thickening' and 'defence  
467 response by callose deposition in cell wall', and systemic defence responses such as  
468 'regulation of salicylic acid mediated signalling pathway' and 'systemic acquired  
469 resistance' (Fig. **5d**). By contrast, genes that were also differentially expressed at lower  
470 densities of Willi354, were greatly enriched for genes related to plant nitrogen  
471 homeostasis, such as 'response to nitrogen compound' and 'response to organonitrogen  
472 compound', plant oxygen levels, such as 'response to oxygen levels' and 'response to  
473 hypoxia' and the plant's 'response to light intensity' (Fig. **5d**).

474  
475 ***Transcriptional changes induced by bacteria may depend on the chromatin state of a***  
476 ***given gene***

477 A major determinant of gene transcriptional regulation is the chromatin state of genes.  
478 Chromatin states are determined by the combination of chromatin modifications and  
479 histone variants. Various histone modifications, such as H3K4me3, H3K36me3 and lysine  
480 acetylation, were previously shown to contribute to the induction of genes in response to  
481 pathogen exposure (Berr *et al.*, 2012; Ding & Wang, 2015). As genes specifically induced by  
482 high densities of Willi354 presented distinct functional enrichment than genes induced by  
483 Willi354 irrespective of inoculation density, we hypothesised that both of sets of genes,  
484 genes activated after high inoculation and genes activated irrespective of inoculation  
485 density, might exhibit different chromatin states prior to inoculation. To that end, the state  
486 of both sets of genes was examined using the chromatin state topology established by  
487 Sequeira-Mendes *et al.* (2014) (Fig. **6a**). Both sets exhibited an enrichment of states 1 and 2,  
488 which are both characterised by the presence of the histone variant H2A.Z accompanied

489 either by activating marks such as H3K4me3, H3K36me3 or by a combination of activating  
490 (H3K4me3) and repressive (H3K27me3) marks, respectively. They also displayed an  
491 underrepresentation of states 8 and 9, which contain heterochromatic marks such as  
492 H3K9me2 and H3K27me1. In addition, genes which are upregulated by Willi354  
493 irrespective of inoculation density showed an underrepresentation of states 3, 5, 6 and 7.  
494 By contrast, genes solely induced by the highest density of Willi354 either showed an  
495 enrichment (state 6) or no difference to the reference. These results reveal that, similarly to  
496 the distinct functional enrichments, genes induced specifically by higher bacterial  
497 densities exhibit a partially different chromatin signature than genes that are also induced  
498 by lower densities.

499  
500 As the genes induced solely by the higher densities of Willi354 displayed an enrichment  
501 for plant immunity and defence-related terms (Fig. **5d**), we wondered whether those genes  
502 would have a similar chromatin profile as genes induced by Pst. The genes were divided  
503 into two sets, depending on whether they were induced specifically by Pst or whether they  
504 were also induced by Willi354 or Micro347 (Fig. **6b**). Similarly, to the previous analysis,  
505 both sets presented an enrichment for states 1 and 2 and an underrepresentation for states  
506 8 and 9. They also showed an underrepresentation of state 5, characterised by the presence  
507 of the repressive mark H3K27me3. Additionally, genes induced by both Pst or  
508 Willi354/Micro347 displayed an underrepresentation of states 6 and 7, which was not  
509 observed or of reduced magnitude for the genes induced specifically by Pst. Despite limited  
510 overlap between the two transcriptomic experiments (Fig. **S6**), the chromatin profiles of  
511 genes induced specifically either by high Willi354 densities or Pst were comparable and  
512 distinct from the profiles of genes induced also by non-pathogenic bacteria or by lower  
513 bacterial densities. This observation supports the idea that inoculation with higher  
514 densities of non-pathogenic bacteria leads to a transcriptomic response similar to that  
515 triggered by pathogenic bacteria.

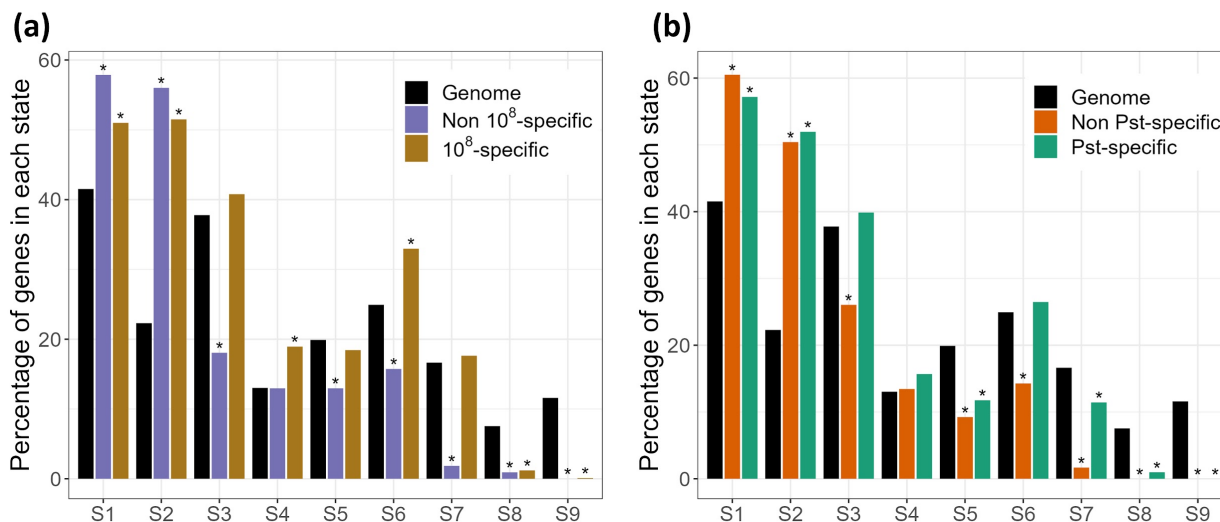

516

517 **Fig. 6: Chromatin state analysis of genes upregulated following bacterial inoculation. (a).**

518 Chromatin state analysis of genes induced either specifically by the highest density ( $10^8$ ) of Willi354

519 or also induced by lower inoculant densities ( $10^5$ ,  $10^6$  or  $10^7$ ). **(b)** Chromatin state analysis of genes

520 induced either specifically by Pst or also induced by Willi354 or Micro347 (all at a density of  $10^7$ ). The

521 chromatin states coordinates were obtained from Sequeira-Mendes et al. (2014). \* indicates

522 significant difference compared to the genome, tested by Marascuilo procedure ( $\alpha = 0.05$ ).

523

524 **High densities of Willi354 caused slight disease phenotypes**

525 Since the genes that were uniquely differentially expressed in plants inoculated with

526 Willi354 at  $10^8$  CFU ml<sup>-1</sup> were enriched for plant immunity-related genes, plants were

527 inoculated with Willi354 under the previous experimental conditions and sampled at 14

528 and 21 dpi, to investigate if Willi354 evokes plant disease phenotypes. Indeed, plants

529 inoculated with Willi354 at  $10^8$  CFU ml<sup>-1</sup>, but not at lower densities, exhibited necrotic

530 lesions on a few leaves 14 and 21 dpi (Fig. 7a-f, Fig. S7). In addition, plant weight was

531 negatively correlated with inoculation density of Willi354 ( $\text{adj.}R^2 = 0.11$ ,  $p = 6.48 \times 10^{-5}$ )

532 (Fig. 7h).

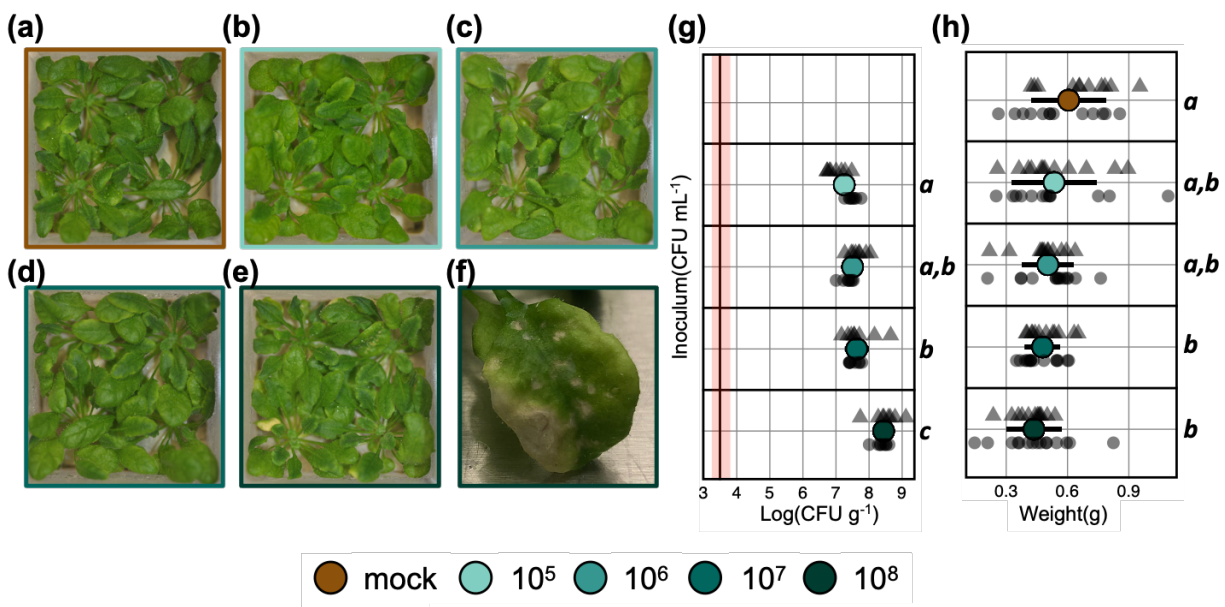

533  
534  
535  
536  
537  
538  
539  
540  
541  
542  
543  
544  
545



## 546 Discussion

547

### 548 *Temporal responses of the plant immune system*

549 Bacteria were spray-inoculated at densities that matched the bacterial carrying capacity of  
550 leaves in temperate environments (Kniskern *et al.*, 2007; Reisberg *et al.*, 2012; Rastogi *et al.*,  
551 2012; Burch *et al.*, 2016; Gekenidis *et al.*, 2017). Four of the six inoculated bacteria  
552 successfully established on plant leaves, whereas two, Acido84 and Pedo194, failed to  
553 consistently reach bacterial densities above the threshold of detection, which was on  
554 average  $\sim 2500$  CFU g<sup>-1</sup> of leaf fresh weight (Fig. **2a**). This was rather surprising as both  
555 genera were previously found to make up more than 1% of the total bacterial population on  
556 arabidopsis (Vorholt, 2012). Further, both strains were recently shown to successfully  
557 colonise arabidopsis (Vogel *et al.*, 2021). However, in the study by Vogel and colleagues,  
558 colonisation density was measured nine days after drop inoculation on seedlings in an  
559 agar-based system. In this study the 'Litterbox' system was employed, which reliably  
560 mimics environmental population densities, as opposed to agar-based systems that exhibit  
561 unnaturally high population densities (Miebach *et al.*, 2020). In addition, Acido84 reached  
562 population densities of  $10^4 - 10^6$  CFU g<sup>-1</sup> in all sampled plants at 168 hpi (i.e. 7 dpi). Since  
563 Acido84 was also successfully recovered straight after inoculation this indicates (1) that  
564 Acido84 was not harmed during the spraying procedure and (2) that it was able to thrive  
565 on leaves at later time points. Overall, this suggests that Acido84 had to acclimatise to its  
566 new environment after growth on R2A media, even though R2A is, like the phyllosphere,  
567 oligotrophic. Pedo194, in contrast, was only successfully recovered from one plant  
568 immediately after spray-inoculation at a density  $\sim 2$  magnitudes lower than the inoculum,  
569 suggesting that the inoculation procedure might have been detrimental to it.

570

571 Pst and Will354 rose in population size to  $\sim 10^7$  CFU g<sup>-1</sup> at 96 hpi. Population size then  
572 declined to  $10^6$  CFU g<sup>-1</sup> at 168 hpi (Fig. **2a**). Whether this was due to exhaustion of resources  
573 or plant immune responses remains to be determined. Interestingly though, the expression  
574 of the ET marker *ARL2* could be explained in large parts by the bacterial density of the  
575 coloniser, irrespective of the inoculant. This suggests that *ARL2* expression must be either

576 triggered by a common MAMP, shared between the isolates, or was triggered by many  
577 MAMPs which the plant did not distinguish between. Further, it suggests that *ARL2*  
578 expression is proportional to the MAMP titer. This agrees with previous findings, which  
579 described stronger transcriptional responses to both higher pathogen and higher MAMP  
580 titers (Thilmony *et al.*, 2006; Denoux *et al.*, 2008).

581  
582 The observed expression changes upon bacterial treatment were overall rather weak (Fig.  
583 **2b**). The strongest changes in gene expression were observed in the ET marker, *ARL2*, and  
584 culminated at 96 hpi. As expected, the strongest changes were observed in the plants  
585 treated with Pst. The overall weak and rather late response seemingly disagrees with  
586 previous studies describing fast and substantial changes in gene expression upon MAMP  
587 treatment and infection with Pst (Thilmony *et al.*, 2006; Zipfel *et al.*, 2006; Denoux *et al.*,  
588 2008; Bjornson *et al.*, 2021). However, in these studies either young seedlings were treated  
589 by a complete change of media, with the fresh media containing the MAMP or leaves of  
590 mature plants were vacuum infiltrated. In both cases MAMPs were readily available. By  
591 contrast, in the case of a surface spray, a sufficient amount of eliciting molecules needs to  
592 cross the hydrophobic cuticle layer to reach the plasma membranes of plant cells  
593 (Schlechter *et al.*, 2019) or bacteria need to migrate into the apoplast (Beattie & Lindow,  
594 1999; Melotto *et al.*, 2006). In addition, the flg22 receptor, FLS2 is highly expressed in leaves  
595 near bacterial entry sites, such as stomata, which are predominantly found on the abaxial  
596 (lower) leaf surface and hydathodes, as well as in leaf veins (Beck *et al.*, 2014). Vacuum  
597 infiltration of bacterial suspensions would render leaf veins more exposed to MAMPs and  
598 a change in liquid media would render stomata and hydathodes more exposed to MAMPs,  
599 than in the more 'natural' scenario of topical application.

600 *Genome-wide transcriptional responses to leaf colonisation*

601

602 *Plant responses to non-pathogenic bacteria are qualitatively similar but differ*  
603 *quantitatively compared to pathogenic bacteria*

604 Bacterial colonisation with non-pathogenic leaf colonisers significantly altered the  
605 expression of several genes in the host, although not to the extent of a pathogenic leaf  
606 coloniser. Remarkably, the responses observed were largely similar, but weaker in  
607 response to colonisation by the non-pathogenic bacteria. Most genes significantly  
608 expressed in response to one strain were also significantly expressed in response to  
609 strains that elicited stronger responses and thus, higher numbers of DEGs. None of the 770  
610 genes with a significant FC in any of the bacterial treatments was upregulated by one  
611 strain and downregulated by another. Changes in gene expression of genes belonging to  
612 clusters 2, 4, 5, 6, 7, 8, 9 and 10 were either progressively increasing or decreasing when  
613 treatments were sorted by the number of DEGs that they elicited (Fig. **4c**). This indicates  
614 that those genes were similarly regulated in response to bacterial colonisation irrespective  
615 of the symbiotic relationship of the inoculant with the plant, although less severely in  
616 response to non-pathogenic bacteria. Such similarity in the plant response to various leaf  
617 colonisers was also described recently by Maier and colleagues, although without the  
618 context of a pathogenic bacterium (Maier *et al.*, 2021). Interestingly, the response strength  
619 was strongly driven by the bacterial density of the inoculant (Maier *et al.*, 2021), which was  
620 also observed in the current study with respect to ET marker responses to non-pathogenic  
621 and pathogenic bacteria. This suggests that plants merely responded to a pool of bacterial  
622 MAMPs quantitatively, by responding to the total amount of MAMPs present, rather than  
623 qualitatively by integrating a unique mix of different MAMPs into a tailored plant  
624 response.

625

626 *The effect of bacterial load on plant gene expression*

627 Bacterial densities were the major driver of ethylene marker expression between 24 and 96  
628 hpi irrespective of the bacterial coloniser (Fig. **3**). In addition, genome-wide transcriptional  
629 responses to bacterial colonisation were largely similar but differed in number of DEGs

630 (Fig. **4b**), as well as in the expression strength of individual genes (Fig. **4c**). This was  
631 remarkable, as the tested strains included bacteria isolated from asymptomatic plants (Bai  
632 *et al.*, 2015) as well as pathogenic Pst (Cuppels, 1986). As pathogenicity is linked to bacterial  
633 density, this raises the question whether non-pathogenicity is merely a case of the plant  
634 limiting uncontrolled proliferation via Pattern Triggered Immunity or bacteria limiting  
635 their proliferation to avoid being penalised by the plant.

636  
637 Plants were inoculated with Willi354 at various concentrations, resulting in different  
638 bacterial densities ranging from somewhat natural densities  $\sim 10^6 - 10^7$  CFU  $g^{-1}$  to  
639 artificially high densities  $\sim 10^8 - 10^9$  CFU  $g^{-1}$  within 96 hpi (Fig. **5a**). These differences in  
640 bacterial densities were still observed at 21 dpi (Fig. **7g**). The maximal bacterial load,  
641 referred to as the carrying capacity, strongly correlated with the inoculation density (Fig.  
642 **5a**), as was previously demonstrated on bean leaves (Wilson & Lindow, 1994; Remus-  
643 Emsermann *et al.*, 2012). Interestingly, severe disease phenotypes were observed on a few  
644 leaves of plants colonised by Willi354 at  $\sim 10^8 - 10^9$  CFU  $g^{-1}$  14 and 21 dpi (Fig. **7e,f**, Fig. **S7**). In  
645 addition, plant weight negatively correlated with bacterial density (Fig. **7g,h**). This  
646 suggests that bacteria that are otherwise non-pathogenic can be detrimental to the plant at  
647 very high densities.

648  
649 RNA sequencing revealed an exponential increase in both the number of DEGs and the  
650 expression pattern of most DEGs to increasing bacterial densities (Fig. **5c**, Fig. **S5**). In  
651 addition, gene expression changes were relatively strong in upregulated genes with FCs up  
652 to  $\sim 30$ -fold (Fig. **S5**). This suggests that the plant barely invests energy into an interaction  
653 with its bacterial colonisers at low bacterial densities, but drastically increases responses  
654 when bacteria are reaching potentially dangerous levels. Accordingly, genes that were  
655 uniquely differentially expressed in plants harbouring Willi354 at  $\sim 10^8 - 10^9$  CFU  $g^{-1}$  were  
656 greatly enriched for immune related GO terms, including perception of the biotic  
657 environment ('response to molecule of bacterial origin', 'response to insect'), metabolism of  
658 secondary metabolites ('indole glucosinolate metabolic process'), local defence responses  
659 ('cell wall thickening', 'defence response by callose deposition in cell wall'), and systemic

660 defence responses ('regulation of salicylic acid mediated signalling pathway', 'systemic  
661 acquired resistance') (Fig. **7d**).

662  
663 Because the plant 'ignores' bacteria at low densities, it appears unlikely that the plant  
664 limits bacterial proliferation by active signalling processes at low bacterial densities.  
665 Consequently, it is likely that bacteria limit their proliferation in order not to alert the plant  
666 immune system. This is in agreement with recent findings showing endophytic bacteria  
667 remaining in population stasis by a multiplication-death equilibrium independent of  
668 bacterial density (Velásquez *et al.*, 2022).

669  
670 The chromatin state analysis further supported the idea that artificially high densities of  
671 non-pathogenic bacteria lead to a transcriptomic response similar to that triggered by  
672 pathogenic bacteria. Genes induced by bacterial inoculation, both at pathogenic and non-  
673 pathogenic level, were enriched for the chromatin states 1 and 2 (Fig. **6**). In more detail  
674 they were enriched in H2A.Z and H3K4me3-H3K27me3 marks, previously shown to be  
675 essential for gene responsiveness to environmental changes (Coleman-Derr & Zilberman,  
676 2012; Sura *et al.*, 2017; Faivre & Schubert, 2023). This suggests that these chromatin marks  
677 might be guiding the transcriptomic response of the plant to bacterial inoculation.

## 678 679 **Conclusion**

680 We show that plant responses to various leaf colonising bacteria are largely similar, both  
681 in the overlap of DEGs and the expression of individual DEGs but differ in expression  
682 strength. We tested the competing hypotheses that plants are either 1) monitoring bacterial  
683 population density or 2) differentiating between different bacterial colonisers. Our results  
684 suggest that plants are responding to bacterial densities rather than bacterial identities,  
685 favouring hypothesis 1) to be the more prevalent mode of plant response to bacteria. It  
686 appears that the plant barely invests resources into an interaction with its associated  
687 bacteria at low bacterial densities, but markedly increases gene expression towards  
688 defence responses upon high bacterial colonisation.

## 689 **Acknowledgements**

690 This work was supported by Marsden Fast Start grant number 17-UOC-057 to M.N.P.R.-E.  
691 by the Royal Society Te Apārangi. M.M. was supported by a University of Canterbury Ph.D.  
692 scholarship.

693

## 694 **Author contributions**

695 M.M., P.E.J. and M.N.P.R.-E. conceived and designed the study. M.M. performed all  
696 laboratory experiments and analysed the data. L.F. and D.S performed additional data  
697 analysis. M.M. wrote the initial draft of the manuscript and all authors contributed to later  
698 versions of the manuscript and to data interpretation.

699

## 700 **Conflict of interest**

701 The authors declare that they have no conflict of interest

## 702 References

- 703 Bai Y, Müller DB, Srinivas G, Garrido-Oter R, Potthoff E, Rott M, Dombrowski N, Münch PC,  
704 Spaepen S, Remus-Emsermann M, *et al.* 2015. Functional overlap of the Arabidopsis leaf  
705 and root microbiota. *Nature* **528**: 364–369.
- 706 Beattie GA, Lindow SE. 1999. Bacterial colonization of leaves: A spectrum of strategies.  
707 *Phytopathology* **89**: 353–359.
- 708 Beck M, Wyrsh I, Strutt J, Wimalasekera R, Webb A, Boller T, Robatzek S. 2014. Expression  
709 patterns of flagellin sensing 2 map to bacterial entry sites in plant shoots and roots.  
710 *Journal of experimental botany* **65**: 6487–6498.
- 711 Berr A, Ménard R, Heitz T, Shen W-H. 2012. Chromatin modification and remodelling: a  
712 regulatory landscape for the control of Arabidopsis defence responses upon pathogen  
713 attack. *Cellular microbiology* **14**: 829–839.
- 714 Bjornson M, Pimprakar P, Nürnberger T, Zipfel C. 2021. The transcriptional landscape of  
715 *Arabidopsis thaliana* pattern-triggered immunity. *Nature plants* **7**: 579–586.
- 716 Burch AY, Do PT, Sbodio A, Suslow TV, Lindow SE. 2016. High-level culturability of  
717 epiphytic bacteria and frequency of biosurfactant producers on leaves. *Applied and*  
718 *environmental microbiology* **82**: 5997–6009.
- 719 Chen L-Q, Hou B-H, Lalonde S, Takanaga H, Hartung ML, Qu X-Q, Guo W-J, Kim J-G,  
720 Underwood W, Chaudhuri B, *et al.* 2010. Sugar transporters for intercellular exchange and  
721 nutrition of pathogens. *Nature* **468**: 527–532.
- 722 Coleman-Derr D, Zilberman D. 2012. Deposition of histone variant H2A.Z within gene bodies  
723 regulates responsive genes. *PLoS genetics* **8**: e1002988.
- 724 Cuppels DA. 1986. Generation and characterization of Tn5 insertion mutations in  
725 *Pseudomonas syringae* pv. tomato. *Applied and environmental microbiology* **51**: 323–327.
- 726 Czechowski T, Stitt M, Altmann T, Udvardi MK, Scheible W-R. 2005. Genome-wide

- 727 identification and testing of superior reference genes for transcript normalization in  
728 *Arabidopsis*. *Plant physiology* **139**: 5–17.
- 729 Denoux C, Galletti R, Mammarella N, Gopalan S, Werck D, De Lorenzo G, Ferrari S, Ausubel  
730 FM, Dewdney J. 2008. Activation of defense response pathways by OGs and Flg22 elicitors  
731 in *Arabidopsis* seedlings. *Molecular plant* **1**: 423–445.
- 732 Ding B, Wang G-L. 2015. Chromatin versus pathogens: the function of epigenetics in plant  
733 immunity. *Frontiers in plant science* **6**: 675.
- 734 Dombrecht B, Xue GP, Sprague SJ, Kirkegaard JA, Ross JJ, Reid JB, Fitt GP, Sewelam N,  
735 Schenk PM, Manners JM, *et al.* 2007. MYC2 differentially modulates diverse jasmonate-  
736 dependent functions in *Arabidopsis*. *The Plant cell* **19**: 2225–2245.
- 737 Durinck S, Moreau Y, Kasprzyk A, Davis S, De Moor B, Brazma A, Huber W. 2005. BioMart  
738 and Bioconductor: a powerful link between biological databases and microarray data  
739 analysis. *Bioinformatics* **21**: 3439–3440.
- 740 Faivre L, Schubert D. 2023. Facilitating transcriptional transitions: an overview of  
741 chromatin bivalency in plants. *Journal of experimental botany* **74**: 1770–1783.
- 742 Gekenidis M-T, Gossin D, Schmelcher M, Schöner U, Remus-Emsermann MNP, Drissner D.  
743 2017. Dynamics of culturable mesophilic bacterial communities of three fresh herbs and  
744 their production environment. *Journal of applied microbiology* **123**: 916–932.
- 745 Hacquard S, Garrido-Oter R, González A, Spaepen S, Ackermann G, Lebeis S, McHardy AC,  
746 Dangl JL, Knight R, Ley R, *et al.* 2015. Microbiota and host nutrition across plant and animal  
747 kingdoms. *Cell host & microbe* **17**: 603–616.
- 748 He Z, Webster S, He SY. 2022. Growth–defense trade-offs in plants. *Current biology: CB* **32**:  
749 R634–R639.
- 750 Huot B, Yao J, Montgomery BL, He SY. 2014. Growth-defense tradeoffs in plants: a  
751 balancing act to optimize fitness. *Molecular plant* **7**: 1267–1287.



- 752 **Innerebner G, Knief C, Vorholt JA. 2011.** Protection of *Arabidopsis thaliana* against leaf-  
753 pathogenic *Pseudomonas syringae* by Sphingomonas strains in a controlled model  
754 system. *Applied and environmental microbiology* **77**: 3202–3210.
- 755 **Ji P, Wilson M. 2002.** Assessment of the importance of similarity in carbon source  
756 utilization profiles between the biological control agent and the pathogen in biological  
757 control of bacterial speck of tomato. *Applied and environmental microbiology* **68**: 4383–  
758 4389.
- 759 **Kelly S, Mun T, Stougaard J, Ben C, Andersen SU. 2018.** Distinct *Lotus japonicus*  
760 transcriptomic responses to a spectrum of bacteria ranging from symbiotic to pathogenic.  
761 *Frontiers in plant science* **9**: 1218.
- 762 **Kim Y, Tsuda K, Igarashi D, Hillmer RA, Sakakibara H, Myers CL, Katagiri F. 2014.**  
763 Mechanisms underlying robustness and tunability in a plant immune signaling network.  
764 *Cell host & microbe* **15**: 84–94.
- 765 **Kniskern JM, Traw MB, Bergelson J. 2007.** Salicylic acid and jasmonic acid signaling  
766 defense pathways reduce natural bacterial diversity on *Arabidopsis thaliana*. *Molecular*  
767 *plant-microbe interactions: MPMI* **20**: 1512–1522.
- 768 **La Camera S, L'Haridon F, Astier J, Zander M, Abou-Mansour E, Page G, Thurow C,**  
769 **Wendehenne D, Gatz C, Métraux J-P, et al. 2011.** The glutaredoxin ATGRXS13 is required to  
770 facilitate *Botrytis cinerea* infection of *Arabidopsis thaliana* plants: Role of ATGRXS13  
771 during *B. cinerea* infection. *The Plant journal: for cell and molecular biology* **68**: 507–519.
- 772 **Lau JA, Lennon JT. 2012.** Rapid responses of soil microorganisms improve plant fitness in  
773 novel environments. *Proceedings of the National Academy of Sciences of the United*  
774 *States of America* **109**: 14058–14062.
- 775 **Liao Y, Smyth GK, Shi W. 2014.** featureCounts: an efficient general-purpose read  
776 summarization program. *Bioinformatics* **30**: 923–930.

- 777 **Maier BA, Kiefer P, Field CM, Hemmerle L, Bortfeld-Miller M, Emmenegger B, Schäfer M,**  
778 **Pfeilmeier S, Sunagawa S, Vogel CM, et al.** 2021. A general non-self response as part of  
779 plant immunity. *Nature plants* **7**: 696–705.
- 780 **Martin M.** 2011. Cutadapt removes adapter sequences from high-throughput sequencing  
781 reads. *EMBnet journal* **17**: 10–12.
- 782 **McCarthy DJ, Chen Y, Smyth GK.** 2012. Differential expression analysis of multifactor RNA-  
783 Seq experiments with respect to biological variation. *Nucleic acids research* **40**: 4288–4297.
- 784 **McCarthy DJ, Smyth GK.** 2009. Testing significance relative to a fold-change threshold is a  
785 TREAT. *Bioinformatics* **25**: 765–771.
- 786 **Melotto M, Underwood W, Koczan J, Nomura K, He SY.** 2006. Plant stomata function in  
787 innate immunity against bacterial invasion. *Cell* **126**: 969–980.
- 788 **Miebach M, Schlechter RO, Clemens J, Jameson PE, Remus-Emsermann MNP.** 2020.  
789 Litterbox-a gnotobiotic zeolite-clay system to investigate arabidopsis-microbe  
790 interactions. *Microorganisms* **8**.
- 791 **Mi H, Ebert D, Muruganujan A, Mills C, Albou L-P, Mushayamaha T, Thomas PD.** 2021.  
792 PANTHER version 16: a revised family classification, tree-based classification tool,  
793 enhancer regions and extensive API. *Nucleic acids research* **49**: D394–D403.
- 794 **Moore JW, Loake GJ, Spoel SH.** 2011. Transcription dynamics in plant immunity. *The Plant*  
795 *cell* **23**: 2809–2820.
- 796 **Nolan T, Huggett JF, Sanchez E.** 2013. Good practice guide for the application of  
797 quantitative PCR (qPCR). *LGC*.
- 798 **Paracelsus.** 1538. Die dritte Defension wegen des Schreibens der neuen Rezepte. In:  
799 Paracelsus, ed. Septem Defensiones: Die Selbstverteidigung eines Aussenseiters.

- 800 Pieterse CM, van Wees SC, Hoffland E, van Pelt JA, van Loon LC. 1996. Systemic resistance  
801 in *Arabidopsis* induced by biocontrol bacteria is independent of salicylic acid  
802 accumulation and pathogenesis-related gene expression. *The Plant cell* **8**: 1225–1237.
- 803 Rastogi G, Sbodio A, Tech JJ, Suslow TV, Coaker GL, Leveau JHJ. 2012. Leaf microbiota in  
804 an agroecosystem: spatiotemporal variation in bacterial community composition on field-  
805 grown lettuce. *The ISME journal* **6**: 1812–1822.
- 806 Reisberg EE, Hildebrandt U, Riederer M, Hentschel U. 2012. Phyllosphere bacterial  
807 communities of trichome-bearing and trichomeless *Arabidopsis thaliana* leaves. *Antonie*  
808 *van Leeuwenhoek* **101**: 551–560.
- 809 Remus-Emsermann MNP, Tecon R, Kowalchuk GA, Leveau JHJ. 2012. Variation in local  
810 carrying capacity and the individual fate of bacterial colonizers in the phyllosphere. *The*  
811 *ISME journal* **6**: 756–765.
- 812 Ritpitakphong U, Falquet L, Vimoltust A, Berger A, Métraux J-P, L'Haridon F. 2016. The  
813 microbiome of the leaf surface of *Arabidopsis* protects against a fungal pathogen. *The New*  
814 *phytologist* **210**: 1033–1043.
- 815 Robinson MD, McCarthy DJ, Smyth GK. 2010. edgeR: a Bioconductor package for differential  
816 expression analysis of digital gene expression data. *Bioinformatics* **26**: 139–140.
- 817 Robinson MD, Oshlack A. 2010. A scaling normalization method for differential expression  
818 analysis of RNA-seq data. *Genome biology* **11**: R25.
- 819 Schlechter RO, Miebach M, Remus-Emsermann MNP. 2019. Driving factors of epiphytic  
820 bacterial communities: A review. *Journal of advertising research* **19**: 57–65.
- 821 Sequeira-Mendes J, Aragüez I, Peiró R, Mendez-Giraldez R, Zhang X, Jacobsen SE, Bastolla  
822 U, Gutierrez C. 2014. The functional topography of the *Arabidopsis* genome is organized in  
823 a reduced number of linear motifs of chromatin states. *The Plant cell* **26**: 2351–2366.

- 824 Singh SK, Wu X, Shao C, Zhang H. 2022. Microbial enhancement of plant nutrient  
825 acquisition. *Stress Biology*2: 3.
- 826 Spaepen S, Vanderleyden J, Okon Y. 2009. Chapter 7 plant growth-promoting actions of  
827 Rhizobacteria. In: Adv. Bot. Res. Academic Press, 283–320.
- 828 Sura W, Kabza M, Karlowski WM, Bieluszewski T, Kus-Slowinska M, Pawełoszek Ł,  
829 Sadowski J, Ziolkowski PA. 2017. Dual role of the histone variant H2A.Z in transcriptional  
830 regulation of stress-response genes. *The Plant cell*29: 791–807.
- 831 Thilmony R, Underwood W, He SY. 2006. Genome-wide transcriptional analysis of the  
832 *Arabidopsis thaliana* interaction with the plant pathogen *Pseudomonas syringae* pv.  
833 *tomato* DC3000 and the human pathogen *Escherichia coli* O157:H7. *The Plant journal: for*  
834 *cell and molecular biology*.
- 835 Velásquez AC, Huguet-Tapia JC, He SY. 2022. Shared in planta population and  
836 transcriptomic features of nonpathogenic members of endophytic phyllosphere  
837 microbiota. *Proceedings of the National Academy of Sciences of the United States of*  
838 *America* 119: e2114460119.
- 839 Vogel C, Bodenhausen N, Gruissem W, Vorholt JA. 2016. The Arabidopsis leaf  
840 transcriptome reveals distinct but also overlapping responses to colonization by  
841 phyllosphere commensals and pathogen infection with impact on plant health. *The New*  
842 *phytologist* 212: 192–207.
- 843 Vogel CM, Potthoff DB, Schäfer M, Barandun N, Vorholt JA. 2021. Protective role of the  
844 Arabidopsis leaf microbiota against a bacterial pathogen. *Nature microbiology*6: 1537–  
845 1548.
- 846 Vorholt JA. 2012. Microbial life in the phyllosphere. *Nature reviews. Microbiology*10: 828–  
847 840.

- 848 Wang Q, Liu J, Zhu H. 2018. Genetic and molecular mechanisms underlying symbiotic  
849 specificity in Legume-*Rhizobium* interactions. *Frontiers in plant science* **9**: 313.
- 850 Wilson M, Lindow SE. 1994. Inoculum density-dependent mortality and colonization of the  
851 phyllosphere by *Pseudomonas syringae*. *Applied and environmental microbiology* **60**:  
852 2232–2237.
- 853 Yamada K, Saijo Y, Nakagami H, Takano Y. 2016. Regulation of sugar transporter activity  
854 for antibacterial defense in Arabidopsis. *Science* **354**: 1427–1430.
- 855 Zengerer V, Schmid M, Bieri M, Müller DC, Remus-Emsermann MNP, Ahrens CH, Pelludat  
856 C. 2018. *Pseudomonas orientalis* F9: a potent antagonist against phytopathogens with  
857 phytotoxic effect in the apple flower. *Frontiers in microbiology* **9**: 145.
- 858 Zipfel C, Kunze G, Chinchilla D, Caniard A, Jones JDG, Boller T, Felix G. 2006. Perception of  
859 the bacterial PAMP EF-Tu by the receptor EFR restricts Agrobacterium-mediated  
860 transformation. *Cell* **125**: 749–760.
